# Supplementary material for: Sensitivity of northeastern US surface ozone predictions to the representation of atmospheric chemistry in the Community Regional Atmospheric Chemistry Multiphase Mechanism (CRACMMv1.0)
Source: Copernicus journal article supplement (doi:10.5194/acp-23-9173-2023), 2023-08-21
Supplement: Supplementary file [file acp-23-9173-2023-supplement.pdf]

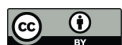

*Supplement of*

**Sensitivity of northeastern US surface ozone predictions to the representation of atmospheric chemistry in the Community Regional Atmospheric Chemistry Multiphase Mechanism (CRACMMv1.0)**

**Bryan K. Place et al.**

*Correspondence to:* Havala O. T. Pye ([pye.havala@epa.gov](mailto:pye.havala@epa.gov))

The copyright of individual parts of the supplement might differ from the article licence.

## Equations used for calculating site-specific statistics reported in Table S1

30

$$\text{Equation 1. } MB = \frac{1}{S} \sum_{j=1}^S \left[ \frac{1}{T} \sum_{i=1}^T (p_{i,j} - o_{i,j}) \right]$$

$$\text{Equation 2. } r = \frac{1}{S} \sum_{j=1}^S \left[ \frac{\sum_{i=1}^T (p_{i,j} - \bar{p}_j)(o_{i,j} - \bar{o}_j)}{\sum_{i=1}^T (p_{i,j} - \bar{p}_j)^2 \sum_{i=1}^T (o_{i,j} - \bar{o}_j)^2} \right]$$

35

$$\text{Equation 3. } NMB = 100\% \times \frac{1}{S} \sum_{j=1}^S \left[ \frac{\sum_{i=1}^T (p_{i,j} - o_{i,j})}{\sum_{i=1}^T (o_{i,j})} \right]$$

$$\text{Equation 4. } NME = 100\% \times \frac{1}{S} \sum_{j=1}^S \left[ \frac{\sum_{i=1}^T (|p_{i,j} - o_{i,j}|)}{\sum_{i=1}^T (o_{i,j})} \right]$$

40

Where S is the number of sites, T is the number of time periods (number of 1-hour or MDA8 values),  $p_{i,j}$  and  $o_{i,j}$  are the model predicted and observed values over a specific time period,  $i$ , at site,  $j$ , and  $\bar{p}_j$  and  $\bar{o}_j$  are the mean predicted and observed values over all times at a site,  $j$ .

45

50

55

**Table S1:** Mapping from CRACMMv0.21 to CRACMMv1.0 and RACM2\_ae6 emissions for use in CMAQ. The mechanism number changed from v0.21 (an interim version used to create CMAQ-ready CRACMM emissions) to v1.0 in the final version used in the study. RACM2\_ae6 mappings are approximate based on the major contributors in each CRACMM category and information from William P.L. Carter (<https://intra.engr.ucr.edu/~carter/emitdb/>).

| <b>CRACMMv0.21 species</b> | <b>CRACMMv1.0 species</b> | <b>RACM2_ae6 Species</b> |
|----------------------------|---------------------------|--------------------------|
| ACRO                       | ACRO                      | MACR                     |
| BDE13                      | BDE13                     | DIEN                     |
| BEN                        | BEN                       | BENZENE                  |
| FURAN                      | FURAN                     | HC8                      |
| HC8                        | HC10                      | HC8                      |
| NAPH                       | NAPH                      | XYM                      |
| PROG                       | PROG                      | HC8                      |
| TOLUENE                    | TOL                       | TOL                      |
| XYOP                       | XYE                       | $XYO*0.5+XYP*0.5$        |
| ROCIOXY                    | VROCIOXY                  | NA                       |

65

70

a)  $(\text{CRACMMv1.0} - \text{Cb6r3\_ae7}) / \text{CRACMMv1.0} * 100\%$

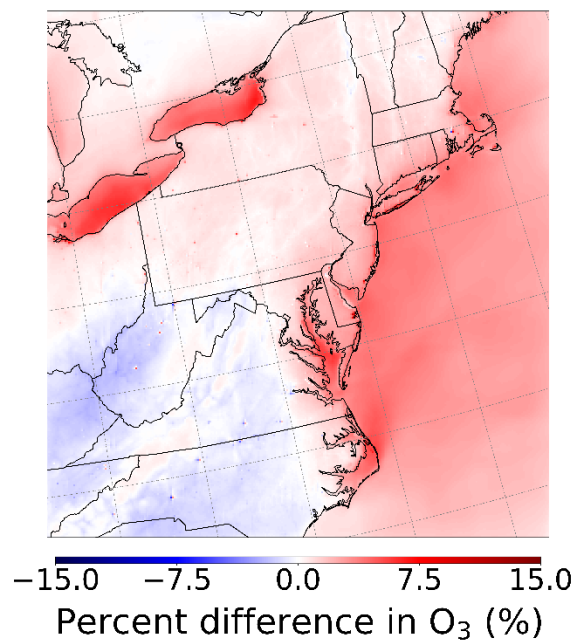

b)  $(\text{CRACMMv1.0} - \text{RACM2\_ae6}) / \text{CRACMMv1.0} * 100\%$

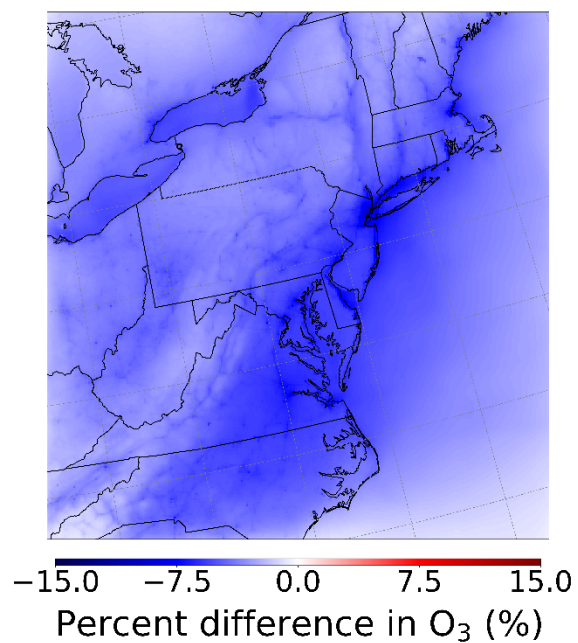

**Figure S1.** Percent difference in average O<sub>3</sub> between a) CRACMMv1.0 and Cb6r3\_ae7 and b) CRACMMv1.0 and RACM2\_ae6.

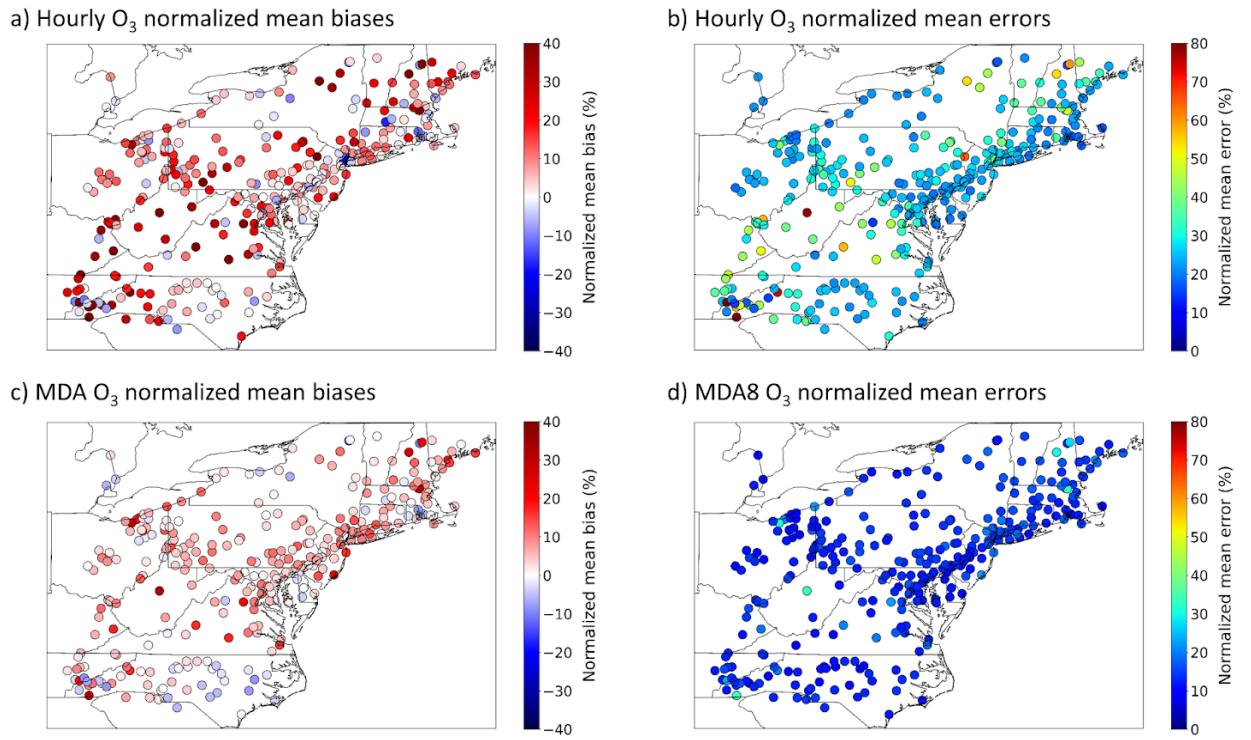

**Figure S2.** CRACMM hourly and MDA8 O<sub>3</sub> NMB and NME site statistics.

110

a) Hourly O<sub>3</sub> mean biases

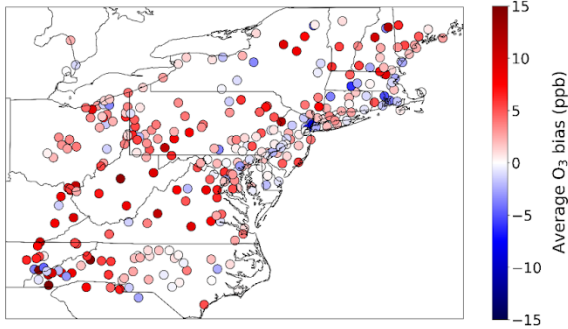

b) Hourly O<sub>3</sub> mean correlations

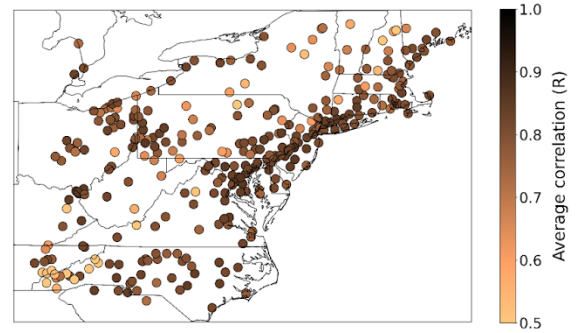

c) Hourly O<sub>3</sub> normalized mean biases

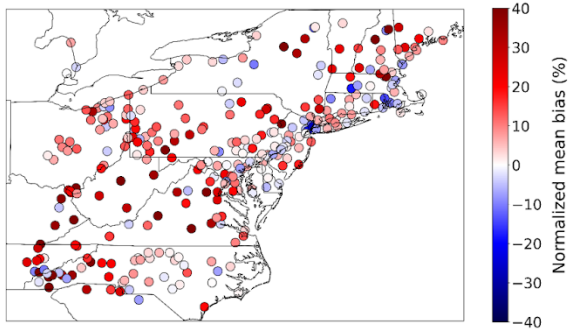

d) Hourly O<sub>3</sub> normalized mean errors

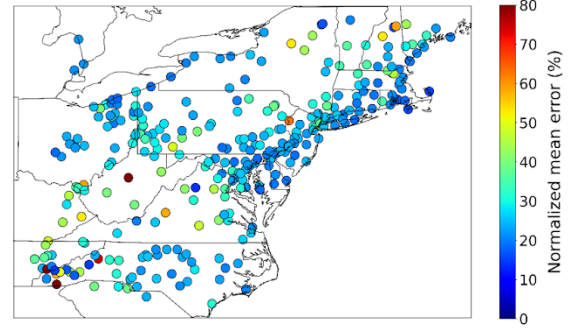

115

**Figure S3.** CB6r3\_ae7 all hour site statistics.

120

125

130

a) Hourly O<sub>3</sub> mean biases

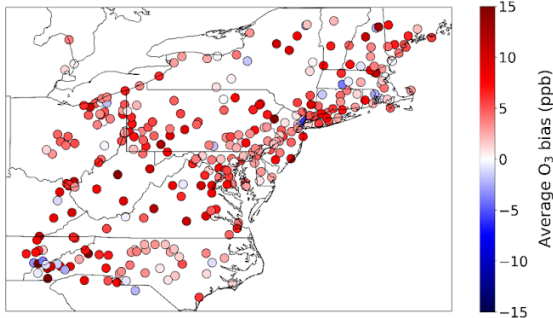

b) Hourly O<sub>3</sub> mean correlations

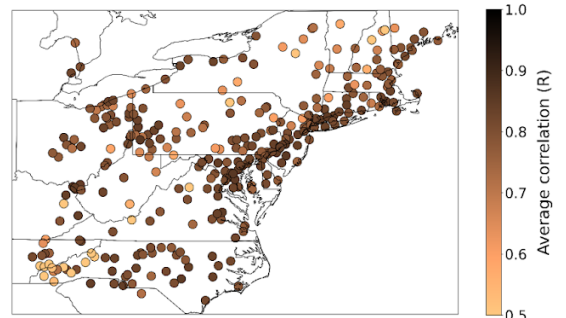

c) Hourly O<sub>3</sub> normalized mean biases

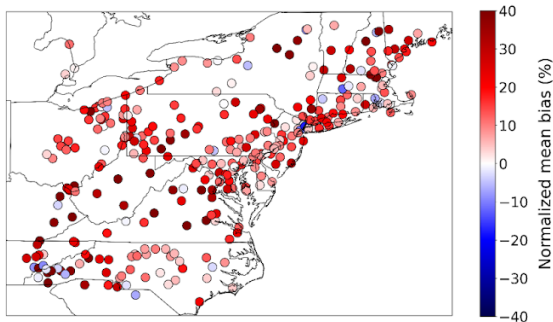

d) Hourly O<sub>3</sub> normalized mean errors

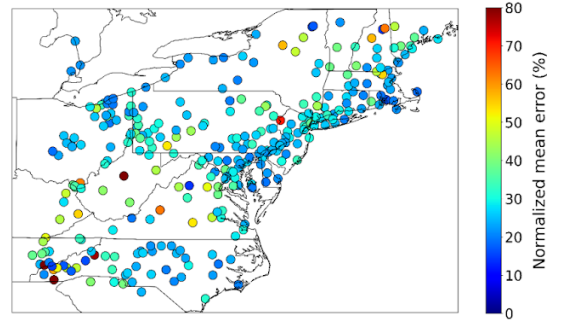

135

**Figure S4.** RACM2\_ae6 all hour O<sub>3</sub> site statistics.

140

145

150

a) MDA8 O<sub>3</sub> mean biases

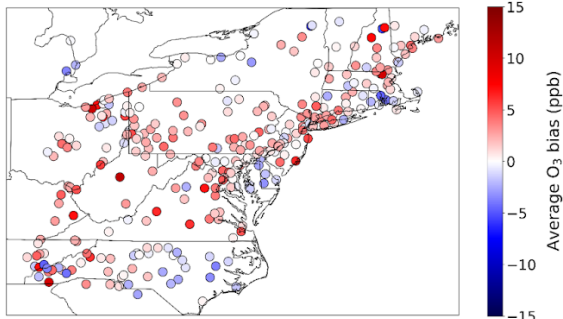

b) MDA O<sub>3</sub> mean correlations

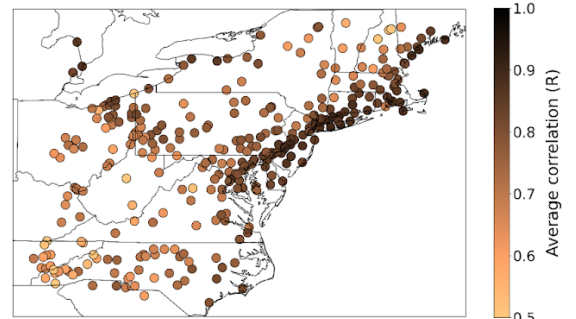

c) MDA8 O<sub>3</sub> normalized mean biases

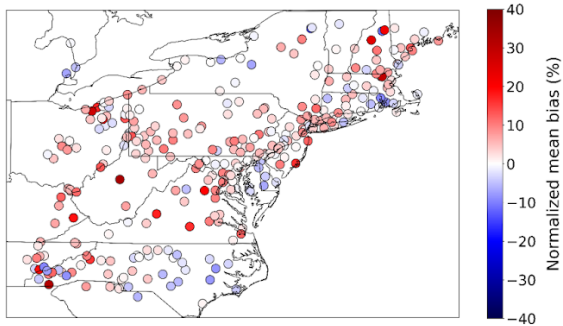

d) MDA8 O<sub>3</sub> normalized mean errors

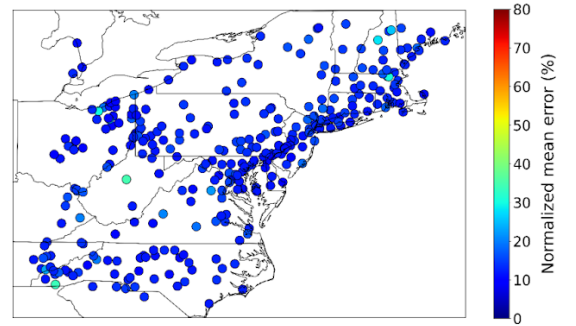

**Figure S5.** CB6r3\_ae7 MDA8 O<sub>3</sub> site statistics.



a) MDA8 O<sub>3</sub> mean biases

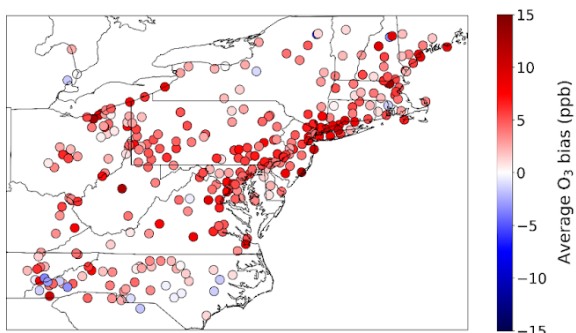

b) MDA O<sub>3</sub> mean correlations

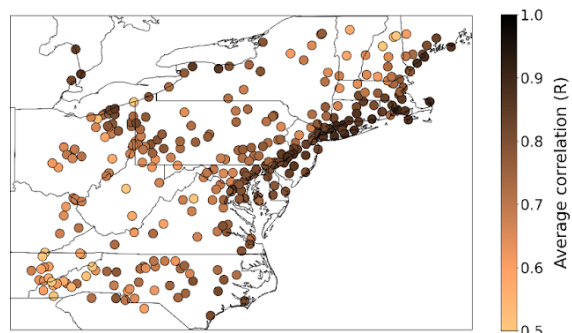

c) MDA8 O<sub>3</sub> normalized mean biases

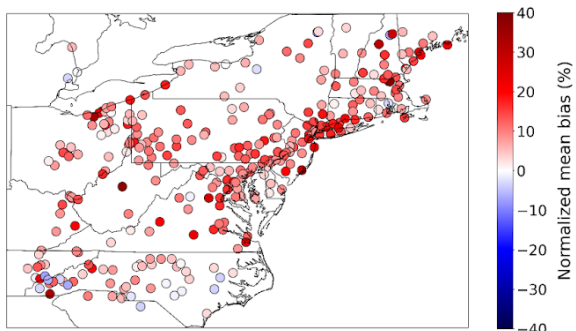

d) MDA8 O<sub>3</sub> normalized mean errors

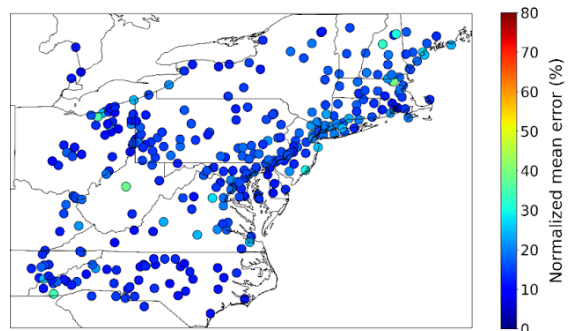

180

**Figure S6.** RACM2\_ae6 MDA8 O<sub>3</sub> site statistics.

185

190

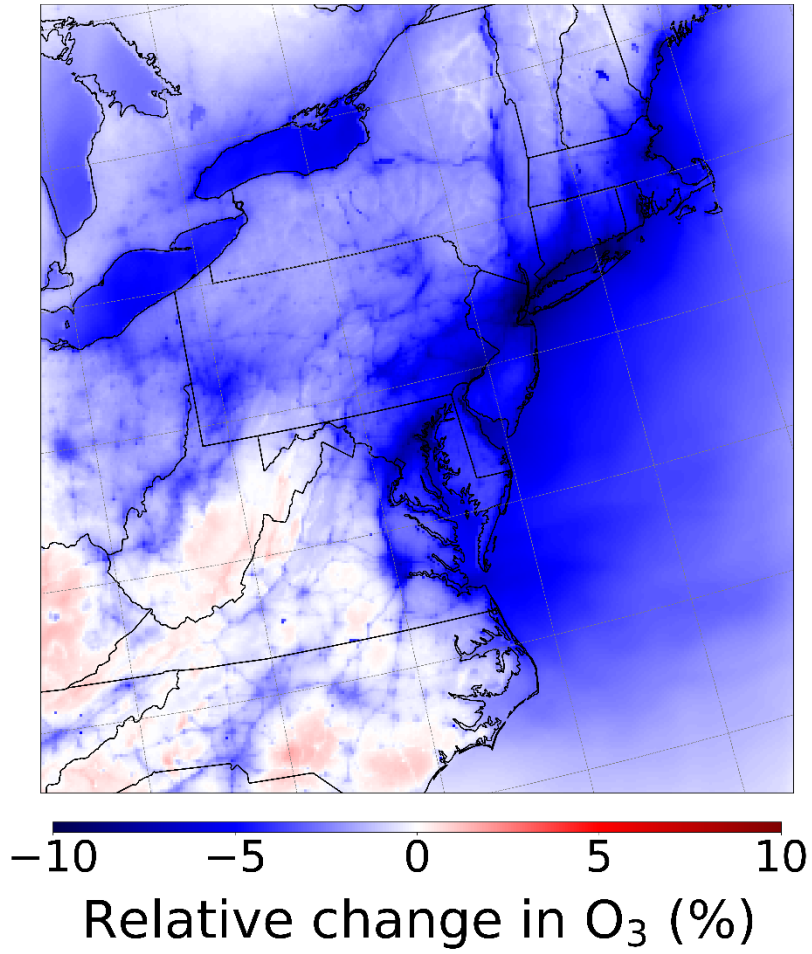

200

**Figure S7.** RACM2\_ae6 biogenic zero-out percent change in O<sub>3</sub>.

205

210

215

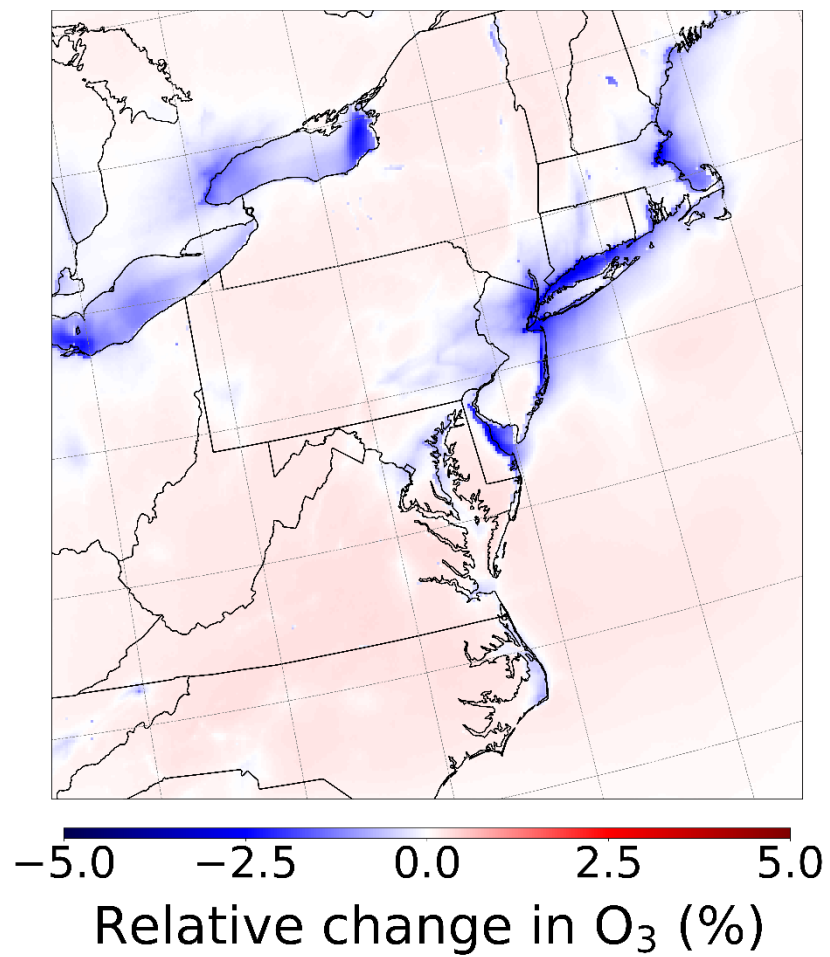

**Figure S8.** RACM2\_ae6 BTX zero out percent change in O<sub>3</sub>.

220

225

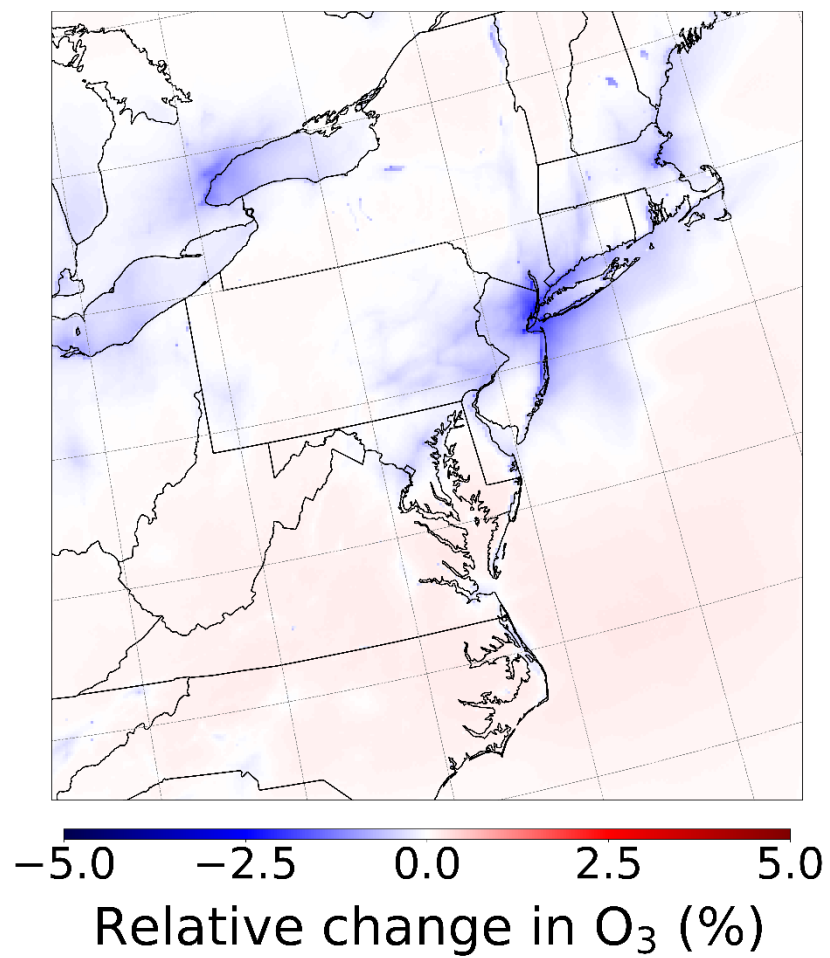

**Figure S9.** CB6r3\_ae7 BTX zero out percent change in O<sub>3</sub>.

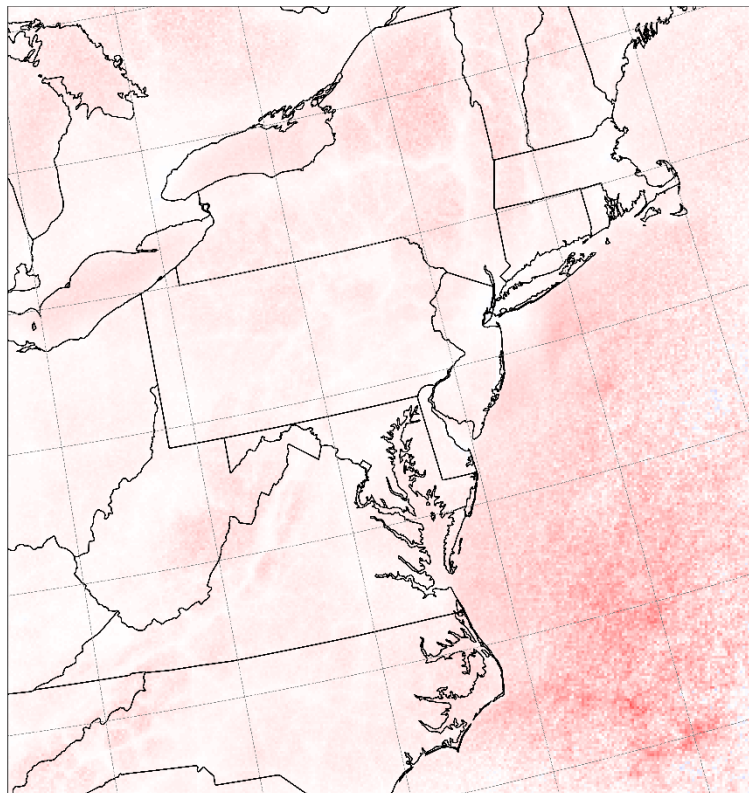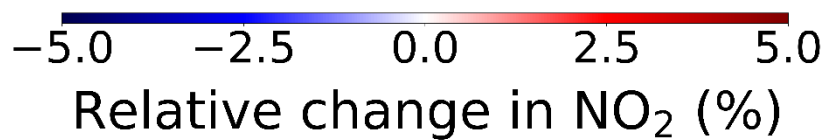

250

**Figure S10.** CRACMM HC10 zero out percent change in NO<sub>2</sub>.

255

260

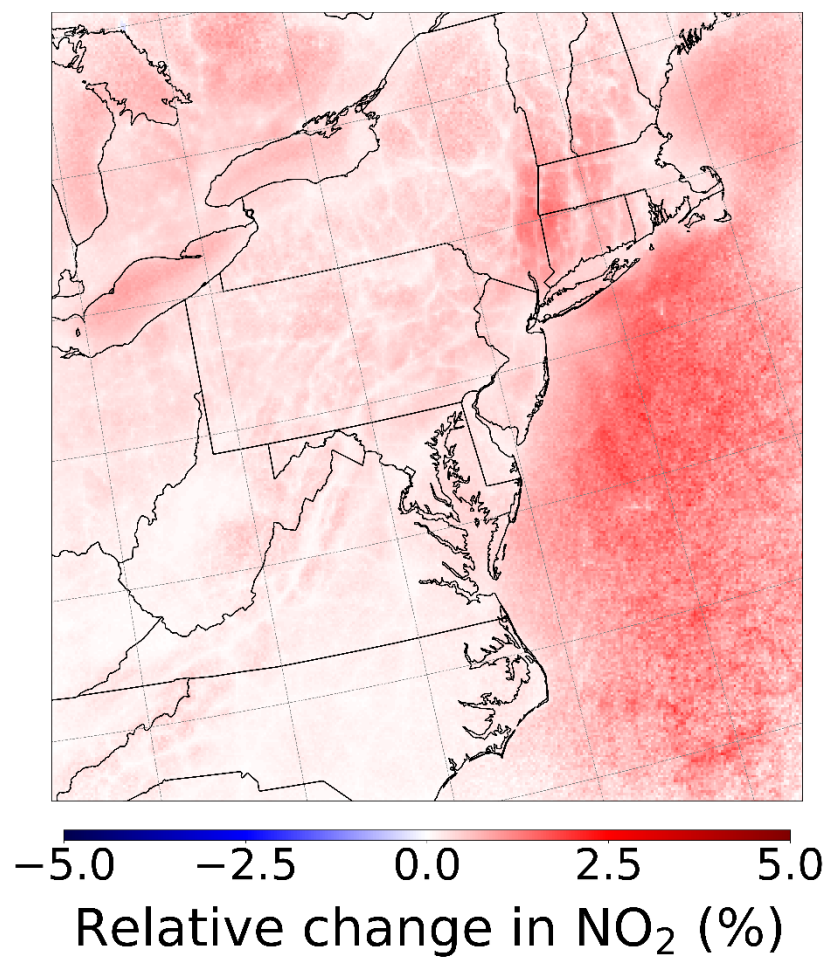

270

**Figure S11.** CRACMM SVOC zero out percent change in NO<sub>2</sub>.

275

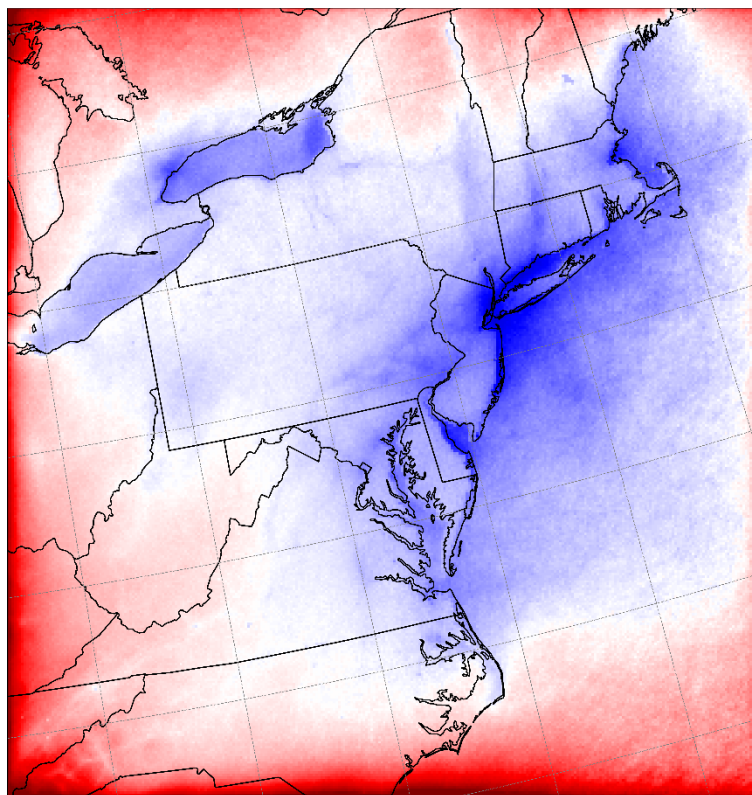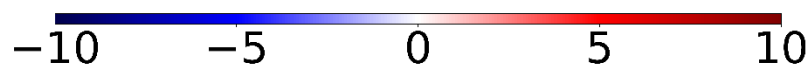

Relative change in organic nitrates (%)

285

**Figure S12.** CRACMM HC10 zero out percent change in organic nitrates.

290

295

300

a)  $\alpha$ -pinene

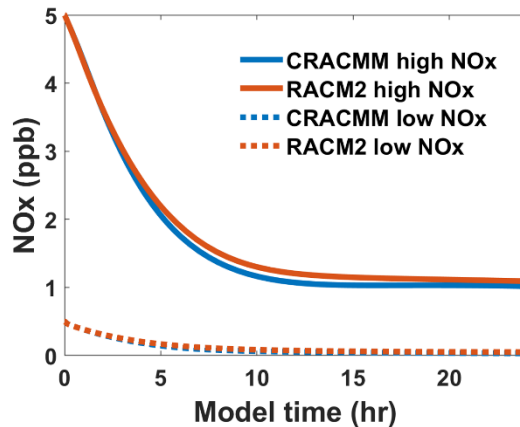

b) Isoprene

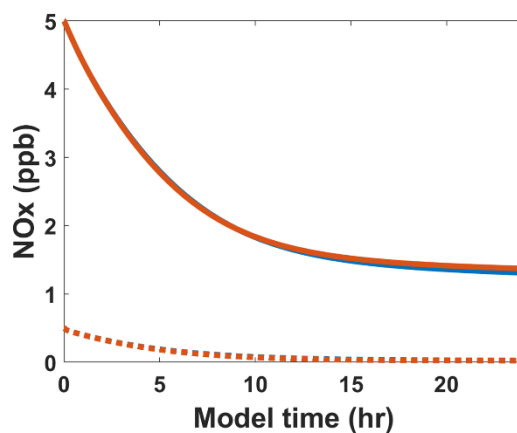

c) Benzene

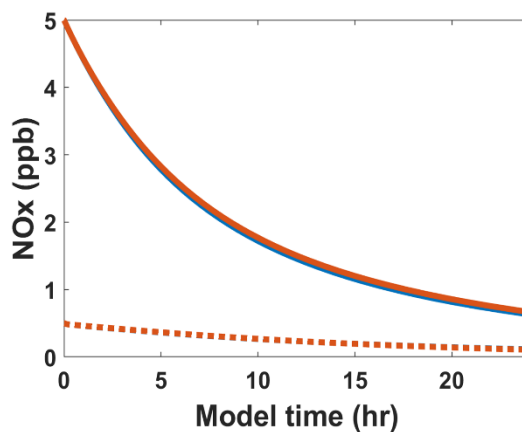

305 **Figure S13.** Evolution of  $\text{NO}_x$  from photochemical oxidation simulations in the F0AM box model simulations using a)  $\alpha$ -pinene and b) isoprene and c) benzene as ROC precursors under high  $\text{NO}_x$  (5ppb) and low  $\text{NO}_x$  (0.5 ppb) conditions.
